# Supplementary material for: Positive Psychology Approaches to Interventions for Cancer Dyads: A Scoping Review
Source: MDPI journal article supplement (doi:10.3390/ijerph192013561), 2022-10-19

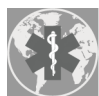

Supplementary Materials

# Positive Psychology Approaches to Interventions for Cancer Dyads: A Scoping Review

**Supplemental Table S1.** Search Keywords & PICOS Question.

| Positive Psychology Constructs | Positive Psychology Interventions              | Caregiver Terms      | Cancer Terms    |
|--------------------------------|------------------------------------------------|----------------------|-----------------|
| Benefit finding                | hope therapy                                   | caregiv*             | Cancer*         |
| blessing                       | mindfulness                                    | care giver*          | Oncology        |
| dispositional optimism         | quality of life therapy                        | carer*               | Neoplasms[Mesh] |
| engagement                     | strength-centered therapy                      | family               |                 |
| flow                           | well-being therapy                             | famil*               |                 |
| gratitude                      | "psychotherapeutic interventions"              | spouse*              |                 |
| happiness                      | "psychological interventions" [tiab]           | relative*            |                 |
| hardiness                      | "psychotherapy" [tiab]                         | partner*             |                 |
| hope                           | "psychotherapy interventions" [tiab]           | Caregivers[Mesh]     |                 |
| humor                          | "behavioral therapy" [tiab]                    | Spouses[Mesh]        |                 |
| kindness                       | "behaviour therapy" [tiab]                     | Family Therapy[Mesh] |                 |
| meaning*                       | "behavioural therapy" [tiab]                   |                      |                 |
| meaning-making                 | "positive psychotherapy" [tiab]                |                      |                 |
| optimism                       | "positive psychology" [tiab]                   |                      |                 |
| personal growth                | positive psycho* [tiab]                        |                      |                 |
| personal strength              | "psychological intervention" [tiab]            |                      |                 |
| positive affect                | "therapeutic intervention" [tiab]              |                      |                 |
| positive coping                | "social constructionist" [tiab]                |                      |                 |
| positive emotions              | "problem solving therapy" [tiab]               |                      |                 |
| positive psychological growth  | "supportive therapy" [tiab]                    |                      |                 |
| positive reappraisal coping    | "meaning centered psychotherapy" [tiab]        |                      |                 |
| positive relationships         | "positive emotion communication" [tiab]        |                      |                 |
| positivity                     | "psychoeducational group interventions" [tiab] |                      |                 |
| posttraumatic growth           | "psychoeducational interventions" [tiab]       |                      |                 |
| resilience                     | "behavioral interventions" [tiab]              |                      |                 |
| satisfaction                   | "behavioural interventions" [tiab]             |                      |                 |
| savoring                       | Psychosocial intervention* [tiab]              |                      |                 |
| spirituality                   | psychosocial [tiab]                            |                      |                 |
| well-being                     | "Psychosocial Support Systems"[Mesh]           |                      |                 |
| "Mindfulness"[Mesh]            | "Psycho-Oncology"[Mesh]                        |                      |                 |
| "Hope"[Mesh]                   |                                                |                      |                 |
| Posttraumatic Growth,          |                                                |                      |                 |
| Psychological[Mesh]            |                                                |                      |                 |
| Optimism[Mesh]                 |                                                |                      |                 |

|                                                                                                                                                                                                                                                                                                                                                                                                                                                                                                                                                                                                                                                                                     |  |  |  |
|-------------------------------------------------------------------------------------------------------------------------------------------------------------------------------------------------------------------------------------------------------------------------------------------------------------------------------------------------------------------------------------------------------------------------------------------------------------------------------------------------------------------------------------------------------------------------------------------------------------------------------------------------------------------------------------|--|--|--|
| Adaptation,<br>Psychological[Mesh]<br>Virtue<br>Forgiveness<br>Flourish<br>Savor*<br>Empower*                                                                                                                                                                                                                                                                                                                                                                                                                                                                                                                                                                                       |  |  |  |
| <p><b>PICO</b> (P = participants/population, I = Interventions/exposures, C = comparators/controls, and O = outcomes; primary and secondary outcomes, S= study type)</p> <p><b>P</b> = Cancer patients/survivors and their primary support person (e.g., spouse/partner, family caregiver)</p> <p><b>I</b> = Positive psychology interventions</p> <p><b>C</b> = N/A</p> <p><b>O</b> = N/A</p> <p><b>S</b> = Original data, observational data, (not a review, meta-analysis, secondary data analysis, case report, case series, commentary, RETROSPECTIVE, REGISTRY STUDIES, etc...). Clinical Trials, Randomized Control Trials, etc. Expanded access trials may be included.</p> |  |  |  |

Supplemental Table S2. Search Strings by Database.

| PubMed.gov Search |                                                                                                                                                                                                                                                                                                                                                                                                                                                                                                                                                                                                                                                                                                                                                                                                                                                                                                                                                                                                                                                                    |
|-------------------|--------------------------------------------------------------------------------------------------------------------------------------------------------------------------------------------------------------------------------------------------------------------------------------------------------------------------------------------------------------------------------------------------------------------------------------------------------------------------------------------------------------------------------------------------------------------------------------------------------------------------------------------------------------------------------------------------------------------------------------------------------------------------------------------------------------------------------------------------------------------------------------------------------------------------------------------------------------------------------------------------------------------------------------------------------------------|
| #                 | PubMed Keywords & Translations                                                                                                                                                                                                                                                                                                                                                                                                                                                                                                                                                                                                                                                                                                                                                                                                                                                                                                                                                                                                                                     |
| 1                 | ((("Benefit finding" [tiab] OR blessing* [tiab] OR "dispositional optimism" [tiab] OR engagement [tiab] OR gratitude* [tiab] OR happiness [tiab] OR hardiness [tiab] OR hope [tiab] OR humor [tiab] OR kindness [tiab] OR meaning* [tiab] OR "meaning-making" [tiab] OR optimism [tiab] OR "personal growth" [tiab] OR "personal strength" [tiab] OR "positive affect" [tiab] OR "positive coping" [tiab] OR "positive emotions" [tiab] OR "positive psychological growth" [tiab] OR "positive reappraisal coping" [tiab] OR "positive relationships" [tiab] OR positivity [tiab] OR "posttraumatic growth" [tiab] OR resilience [tiab] OR satisfaction [tiab] OR savoring [tiab] OR spirituality [tiab] OR "well-being" [tiab] OR Quality of Life[Mesh] OR "Mindfulness"[Mesh] OR "Hope"[Mesh] OR Posttraumatic Growth, Psychological[Mesh] OR Optimism[Mesh] OR Adaptation, Psychological[Mesh] OR Virtue* [tiab] OR Forgiveness [tiab] OR Flourish [tiab] OR Savor* [tiab] OR Empower* [tiab] OR Humor [tiab] OR "Positive psychological functioning" [tiab]))) |
| 2                 | ((("psychotherapeutic interventions" OR "psychological interventions" [tiab] OR "psychotherapy" [tiab] OR "psychotherapy interventions" [tiab] OR "behavioral therapy" [tiab] OR "behaviour therapy" [tiab] OR "behavioural therapy" [tiab] OR "positive psychotherapy" [tiab] OR "positive psychology" [tiab] OR positive psycho* [tiab] OR "psychological intervention" [tiab] OR "therapeutic intervention" [tiab] OR "social constructionist" [tiab] OR "problem solving therapy" [tiab] OR "supportive therapy" [tiab] OR "meaning centered psychotherapy" [tiab] OR "positive emotion communication" [tiab] OR "psychoeducational group interventions" [tiab] OR "psychoeducational interventions" [tiab] OR "behavioral interventions" [tiab] OR "behavioural interventions" [tiab] OR Psychosocial intervention* [tiab] OR psychosocial [tiab] OR "Psychosocial Support Systems"[Mesh] OR "Psycho-Oncology"[Mesh]))                                                                                                                                        |
| 3                 | (((((("Benefit finding" [tiab] OR blessing* [tiab] OR "dispositional optimism" [tiab] OR engagement [tiab] OR gratitude* [tiab] OR happiness [tiab] OR hardiness [tiab] OR hope [tiab] OR humor [tiab] OR kindness [tiab] OR meaning* [tiab] OR "meaning-making" [tiab] OR optimism [tiab] OR "personal growth" [tiab] OR "personal strength" [tiab] OR "positive affect" [tiab] OR "positive coping" [tiab] OR "positive emotions" [tiab] OR "positive psychological growth" [tiab] OR "positive reappraisal coping" [tiab] OR "positive relationships" [tiab] OR positivity [tiab] OR "posttraumatic growth" [tiab] OR resilience [tiab] OR satisfaction [tiab] OR savoring [tiab] OR spirituality [tiab] OR "well-being" [tiab] OR Quality of Life[Mesh] OR "Mindfulness"[Mesh] OR "Hope"[Mesh] OR Posttraumatic Growth, Psychological[Mesh] OR Optimism[Mesh] OR Adaptation, Psychological[Mesh] OR Virtue* [tiab] OR Forgiveness [tiab] OR Flourish [tiab] OR Savor* [tiab] OR Empower* [tiab] OR                                                             |

|   |                                                                                                                                                                                                                                                                                                                                                                                                                                                                                                                                                                                                                                                                                                                                                                                                                                                                                                                                                                                                                                                                                                                                                                                                                                                                                                                                                                                                                                                                                                                                                                                                                                                                                                                                                                                                                                                                                                                                                                                                                                                                                                                                                                                                                                                                                           |
|---|-------------------------------------------------------------------------------------------------------------------------------------------------------------------------------------------------------------------------------------------------------------------------------------------------------------------------------------------------------------------------------------------------------------------------------------------------------------------------------------------------------------------------------------------------------------------------------------------------------------------------------------------------------------------------------------------------------------------------------------------------------------------------------------------------------------------------------------------------------------------------------------------------------------------------------------------------------------------------------------------------------------------------------------------------------------------------------------------------------------------------------------------------------------------------------------------------------------------------------------------------------------------------------------------------------------------------------------------------------------------------------------------------------------------------------------------------------------------------------------------------------------------------------------------------------------------------------------------------------------------------------------------------------------------------------------------------------------------------------------------------------------------------------------------------------------------------------------------------------------------------------------------------------------------------------------------------------------------------------------------------------------------------------------------------------------------------------------------------------------------------------------------------------------------------------------------------------------------------------------------------------------------------------------------|
|   | Humor [tiab] OR "Positive psychological functioning" [tiab] AND ("psychotherapeutic interventions" OR "psychological interventions" [tiab] OR "psychotherapy" [tiab] OR "psychotherapy interventions" [tiab] OR "behavioral therapy" [tiab] OR "behaviour therapy" [tiab] OR "behavioural therapy" [tiab] OR "positive psychotherapy" [tiab] OR "positive psychology" [tiab] OR positive psycho* [tiab] OR "psychological intervention" [tiab] OR "therapeutic intervention" [tiab] OR "social constructionist" [tiab] OR "problem solving therapy" [tiab] OR "supportive therapy" [tiab] OR "meaning centered psychotherapy" [tiab] OR "positive emotion communication" [tiab] OR "psychoeducational group interventions" [tiab] OR "psychoeducational interventions" [tiab] OR "behavioral interventions" [tiab] OR "behavioural interventions" [tiab] OR Psychosocial intervention* [tiab] OR psychosocial [tiab] OR "Psychosocial Support Systems"[Mesh] OR "Psycho-Oncology"[Mesh])                                                                                                                                                                                                                                                                                                                                                                                                                                                                                                                                                                                                                                                                                                                                                                                                                                                                                                                                                                                                                                                                                                                                                                                                                                                                                                  |
| 4 | (caregiv* [tiab] OR care giver* [tiab] OR carer* [tiab] OR family [tiab] OR famil* [tiab] OR spouse* [tiab] OR relative* [tiab] OR partner* [tiab] OR Caregivers[Mesh] OR Spouses[Mesh] OR Family Therapy[Mesh])                                                                                                                                                                                                                                                                                                                                                                                                                                                                                                                                                                                                                                                                                                                                                                                                                                                                                                                                                                                                                                                                                                                                                                                                                                                                                                                                                                                                                                                                                                                                                                                                                                                                                                                                                                                                                                                                                                                                                                                                                                                                          |
| 5 | (Cancer* [tiab] OR Oncology [tiab] OR Neoplasms[Mesh])                                                                                                                                                                                                                                                                                                                                                                                                                                                                                                                                                                                                                                                                                                                                                                                                                                                                                                                                                                                                                                                                                                                                                                                                                                                                                                                                                                                                                                                                                                                                                                                                                                                                                                                                                                                                                                                                                                                                                                                                                                                                                                                                                                                                                                    |
| 6 | (mice [tiab] OR mouse [tiab] OR tumor metabolism [tiab] OR node [tiab] OR nodal [tiab] OR circulating tumor cells [tiab] OR molecule [tiab] OR molecular [tiab] OR phenotype [tiab] OR biopsy [tiab] OR hormone receptor [tiab] OR tissue [tiab] OR cell [tiab] OR benign [tiab] OR antibod* [tiab] OR gene [tiab] OR genetic [tiab] OR receptor* [tiab] OR tumor microenviroment [tiab] OR placebo [tiab] OR ncRNAs [tiab])                                                                                                                                                                                                                                                                                                                                                                                                                                                                                                                                                                                                                                                                                                                                                                                                                                                                                                                                                                                                                                                                                                                                                                                                                                                                                                                                                                                                                                                                                                                                                                                                                                                                                                                                                                                                                                                              |
| 7 | ((((((("Benefit finding" [tiab] OR blessing* [tiab] OR "dispositional optimism" [tiab] OR engagement [tiab] OR gratitude* [tiab] OR happiness [tiab] OR hardiness [tiab] OR hope [tiab] OR humor [tiab] OR kindness [tiab] OR meaning* [tiab] OR "meaning-making" [tiab] OR optimism [tiab] OR "personal growth" [tiab] OR "personal strength" [tiab] OR "positive affect" [tiab] OR "positive coping" [tiab] OR "positive emotions" [tiab] OR "positive psychological growth" [tiab] OR "positive reappraisal coping" [tiab] OR "positive relationships" [tiab] OR positivity [tiab] OR "posttraumatic growth" [tiab] OR resilience [tiab] OR satisfaction [tiab] OR savoring [tiab] OR spirituality [tiab] OR "well-being" [tiab] OR Quality of Life[Mesh] OR "Mindfulness"[Mesh] OR "Hope"[Mesh] OR Posttraumatic Growth, Psychological[Mesh] OR Optimism[Mesh] OR Adaptation, Psychological[Mesh] OR Virtue* [tiab] OR Forgiveness [tiab] OR Flourish [tiab] OR Savor* [tiab] OR Empower* [tiab] OR Humor [tiab] OR "Positive psychological functioning" [tiab] AND ("psychotherapeutic interventions" OR "psychological interventions" [tiab] OR "psychotherapy" [tiab] OR "psychotherapy interventions" [tiab] OR "behavioral therapy" [tiab] OR "behaviour therapy" [tiab] OR "behavioural therapy" [tiab] OR "positive psychotherapy" [tiab] OR "positive psychology" [tiab] OR positive psycho* [tiab] OR "psychological intervention" [tiab] OR "therapeutic intervention" [tiab] OR "social constructionist" [tiab] OR "problem solving therapy" [tiab] OR "supportive therapy" [tiab] OR "meaning centered psychotherapy" [tiab] OR "positive emotion communication" [tiab] OR "psychoeducational group interventions" [tiab] OR "psychoeducational interventions" [tiab] OR "behavioral interventions" [tiab] OR "behavioural interventions" [tiab] OR Psychosocial intervention* [tiab] OR psychosocial [tiab] OR "Psychosocial Support Systems"[Mesh] OR "Psycho-Oncology"[Mesh])))) AND ((Cancer* [tiab] OR Oncology [tiab] OR Neoplasms[Mesh])))) AND ((caregiv* [tiab] OR care giver* [tiab] OR carer* [tiab] OR family [tiab] OR famil* [tiab] OR spouse* [tiab] OR relative* [tiab] OR partner* [tiab] OR Caregivers[Mesh] OR Spouses[Mesh] OR Family Therapy[Mesh])) |
| 8 | ((((((("Benefit finding" [tiab] OR blessing* [tiab] OR "dispositional optimism" [tiab] OR engagement [tiab] OR gratitude* [tiab] OR happiness [tiab] OR hardiness [tiab] OR hope [tiab] OR humor [tiab] OR kindness [tiab] OR meaning* [tiab] OR "meaning-making" [tiab] OR optimism [tiab] OR "personal growth" [tiab] OR "personal strength" [tiab] OR "positive affect" [tiab] OR "positive coping" [tiab] OR "positive emotions" [tiab] OR "positive psychological growth" [tiab] OR "positive reappraisal coping" [tiab] OR "positive relationships" [tiab] OR positivity [tiab] OR "posttraumatic growth" [tiab] OR resilience [tiab] OR satisfaction [tiab] OR savoring [tiab] OR spirituality [tiab] OR "well-being" [tiab] OR Quality of Life[Mesh] OR "Mindfulness"[Mesh] OR "Hope"[Mesh] OR Posttraumatic Growth, Psychological[Mesh] OR Optimism[Mesh] OR Adaptation, Psychological[Mesh] OR Virtue* [tiab] OR Forgiveness [tiab] OR Flourish [tiab] OR Savor* [tiab] OR Empower* [tiab] OR Humor [tiab] OR "Positive psychological functioning" [tiab] AND ("psychotherapeutic interventions" OR "psychological interventions" [tiab] OR "psychotherapy" [tiab] OR "psychotherapy interventions" [tiab] OR "behavioral therapy" [tiab] OR "behaviour therapy" [tiab] OR "behavioural therapy" [tiab] OR "positive psychotherapy" [tiab] OR "positive psychology" [tiab] OR                                                                                                                                                                                                                                                                                                                                                                                                                                                                                                                                                                                                                                                                                                                                                                                                                                                                                                   |

|                                                              |                                                                                                                                                                                                                                                                                                                                                                                                                                                                                                                                                                                                                                                                                                                                                                                                                                                                                                                                                                                                                                                                                                                                                                                                                                                                                                                                    |
|--------------------------------------------------------------|------------------------------------------------------------------------------------------------------------------------------------------------------------------------------------------------------------------------------------------------------------------------------------------------------------------------------------------------------------------------------------------------------------------------------------------------------------------------------------------------------------------------------------------------------------------------------------------------------------------------------------------------------------------------------------------------------------------------------------------------------------------------------------------------------------------------------------------------------------------------------------------------------------------------------------------------------------------------------------------------------------------------------------------------------------------------------------------------------------------------------------------------------------------------------------------------------------------------------------------------------------------------------------------------------------------------------------|
|                                                              | positive psycho* [tiab] OR "psychological intervention" [tiab] OR "therapeutic intervention" [tiab] OR "social constructionist" [tiab] OR "problem solving therapy" [tiab] OR "supportive therapy" [tiab] OR "meaning centered psychotherapy" [tiab] OR "positive emotion communication" [tiab] OR "psychoeducational group interventions" [tiab] OR "psychoeducational interventions" [tiab] OR "behavioral interventions" [tiab] OR "behavioural interventions" [tiab] OR Psychosocial intervention* [tiab] OR psychosocial [tiab] OR "Psychosocial Support Systems"[Mesh] OR "Psycho-Oncology"[Mesh])) AND ((Cancer* [tiab] OR Oncology [tiab] OR Neoplasms[Mesh])) AND ((caregiv* [tiab] OR care giver* [tiab] OR carer* [tiab] OR family [tiab] OR famil* [tiab] OR spouse* [tiab] OR relative* [tiab] OR partner* [tiab] OR Caregivers[Mesh] OR Spouses[Mesh] OR Family Therapy[Mesh])) NOT (((mice [tiab] OR mouse [tiab] OR tumor metabolism [tiab] OR node [tiab] OR nodal [tiab] OR circulating tumor cells [tiab] OR molecule [tiab] OR molecular [tiab] OR phenotype [tiab] OR biopsy [tiab] OR hormone receptor [tiab] OR tissue [tiab] OR cell [tiab] OR benign [tiab] OR antibod* [tiab] OR gene [tiab] OR genetic [tiab] OR receptor* [tiab] OR tumor microenviroment [tiab] OR placebo [tiab] OR ncRNAs [tiab]))) |
| 9                                                            | ((("Benefit finding" [tiab] OR blessing* [tiab] OR "dispositional optimism" [tiab] OR engagement [tiab] OR gratitude* [tiab] OR happiness [tiab] OR hardiness [tiab] OR hope [tiab] OR humor [tiab] OR kindness [tiab] OR meaning* [tiab] OR "meaning-making" [tiab] OR optimism [tiab] OR "personal growth" [tiab] OR "personal strength" [tiab] OR "positive affect" [tiab] OR "positive coping" [tiab] OR "positive emotions" [tiab] OR "positive psychological growth" [tiab] OR "positive reappraisal coping" [tiab] OR "positive relationships" [tiab] OR positivity [tiab] OR "posttraumatic growth" [tiab] OR resilience [tiab] OR satisfaction [tiab] OR savoring [tiab] OR spirituality [tiab] OR "well-being" [tiab] OR Quality of Life[Mesh] OR "Mindfulness"[Mesh] OR "Hope"[Mesh] OR Posttraumatic Growth, Psychological[Mesh] OR Optimism[Mesh] OR Adaptation, Psychological[Mesh] OR Virtue* [tiab] OR Forgiveness [tiab] OR Flourish [tiab] OR Savor* [tiab] OR Empower* [tiab] OR Humor [tiab] OR "Positive psychological functioning" [tiab])))                                                                                                                                                                                                                                                                 |
| <b>Final Action:</b> Export results for 8 to EndNote.        |                                                                                                                                                                                                                                                                                                                                                                                                                                                                                                                                                                                                                                                                                                                                                                                                                                                                                                                                                                                                                                                                                                                                                                                                                                                                                                                                    |
| <b>Cochrane Library Search</b>                               |                                                                                                                                                                                                                                                                                                                                                                                                                                                                                                                                                                                                                                                                                                                                                                                                                                                                                                                                                                                                                                                                                                                                                                                                                                                                                                                                    |
| #                                                            | <b>Cochrane Search String</b>                                                                                                                                                                                                                                                                                                                                                                                                                                                                                                                                                                                                                                                                                                                                                                                                                                                                                                                                                                                                                                                                                                                                                                                                                                                                                                      |
| 1                                                            | caregiv* OR (care AND giver*) OR carer*                                                                                                                                                                                                                                                                                                                                                                                                                                                                                                                                                                                                                                                                                                                                                                                                                                                                                                                                                                                                                                                                                                                                                                                                                                                                                            |
| 2                                                            | TS=(pembrolizumab OR keytruda)                                                                                                                                                                                                                                                                                                                                                                                                                                                                                                                                                                                                                                                                                                                                                                                                                                                                                                                                                                                                                                                                                                                                                                                                                                                                                                     |
| 3                                                            | (positive AND psychology) OR mindfulness OR (quality NEAR/1 life) OR well-being OR wellbeing OR (behavioral AND therapy) OR (behaviour AND therapy) OR psycho-oncology                                                                                                                                                                                                                                                                                                                                                                                                                                                                                                                                                                                                                                                                                                                                                                                                                                                                                                                                                                                                                                                                                                                                                             |
| 4                                                            | #1 AND #2                                                                                                                                                                                                                                                                                                                                                                                                                                                                                                                                                                                                                                                                                                                                                                                                                                                                                                                                                                                                                                                                                                                                                                                                                                                                                                                          |
| 5                                                            | MeSH descriptor: [Neoplasms] explode all trees                                                                                                                                                                                                                                                                                                                                                                                                                                                                                                                                                                                                                                                                                                                                                                                                                                                                                                                                                                                                                                                                                                                                                                                                                                                                                     |
| 6                                                            | #3 AND #4                                                                                                                                                                                                                                                                                                                                                                                                                                                                                                                                                                                                                                                                                                                                                                                                                                                                                                                                                                                                                                                                                                                                                                                                                                                                                                                          |
| <b>Final Action:</b> Export results to EndNote & deduplicate |                                                                                                                                                                                                                                                                                                                                                                                                                                                                                                                                                                                                                                                                                                                                                                                                                                                                                                                                                                                                                                                                                                                                                                                                                                                                                                                                    |
| <b>Embase Search</b>                                         |                                                                                                                                                                                                                                                                                                                                                                                                                                                                                                                                                                                                                                                                                                                                                                                                                                                                                                                                                                                                                                                                                                                                                                                                                                                                                                                                    |
| #                                                            | <b>Embase Search String</b>                                                                                                                                                                                                                                                                                                                                                                                                                                                                                                                                                                                                                                                                                                                                                                                                                                                                                                                                                                                                                                                                                                                                                                                                                                                                                                        |
| 1                                                            | ('benefit-finding'/exp OR 'benefit-finding' OR blessing OR 'dispositional optimism' OR 'engagement' OR 'gratitude' OR 'happiness' OR 'hardiness' OR 'hope' OR humor OR 'kindness' OR 'meaning-making' OR 'optimism' OR 'personal growth' OR 'personal strength' OR 'positive affect' OR 'positive coping' OR 'positive emotions' OR 'positive psychological growth' OR 'positive reappraisal coping' OR 'positive relationships' OR 'positivity' OR 'posttraumatic growth' OR 'psychological resilience' OR 'satisfaction' OR savoring OR 'religion' OR 'wellbeing' OR 'mindfulness' OR 'posttraumatic growth (psychology)' OR 'coping behavior' OR 'morality' OR 'empowerment') AND ('caregiver' OR caregiv* OR 'family' OR famil* OR 'spouse' OR 'partner') AND ('malignant neoplasm'/exp OR 'malignant neoplasm') AND ('hope therapy' OR 'meaningful life therapy' OR 'mindfulness based therapy' OR 'mindfulness based stress reduction' OR 'mindfulness based cognitive therapy' OR 'mindfulness meditation' OR 'positive psychotherapy' OR 'positive psychology' OR 'positive psychology intervention' OR 'psychotherapy' OR 'social constructionism') AND [embase]/lim NOT ([embase]/lim AND [medline]/lim)<br>Mapped termsn/a                                                                                              |
| <b>Final Action:</b> Export results to EndNote.              |                                                                                                                                                                                                                                                                                                                                                                                                                                                                                                                                                                                                                                                                                                                                                                                                                                                                                                                                                                                                                                                                                                                                                                                                                                                                                                                                    |

Supplemental Table S3. Study Inclusion &amp; Exclusion Criteria.

| Inclusion Criteria                                                                                                                                                                                                                                                                                                                                                                                                                                                                                                                                                                                                                                                                                                                                                                                                                                                                                                                                                                                                                                                                                                                                                                                                                                                                                                                                                                                                                                                                                                                                                                                                                                                                                                                                                                                                                                                                                                                                                                                                                                                                                                                                                                                                                                                                                                                                                                                                                                                                                                                                                                                                                                                                                                                                                                                                                                                                                                                                                                                                                                       | Exclusion Criteria                                                                                                                                                                                                                                                                                                                                                                                                                                                                                                                                                                                                                                                                                                                                                                                                                                                                                                                                                                                                                                                                                                                                                  |
|----------------------------------------------------------------------------------------------------------------------------------------------------------------------------------------------------------------------------------------------------------------------------------------------------------------------------------------------------------------------------------------------------------------------------------------------------------------------------------------------------------------------------------------------------------------------------------------------------------------------------------------------------------------------------------------------------------------------------------------------------------------------------------------------------------------------------------------------------------------------------------------------------------------------------------------------------------------------------------------------------------------------------------------------------------------------------------------------------------------------------------------------------------------------------------------------------------------------------------------------------------------------------------------------------------------------------------------------------------------------------------------------------------------------------------------------------------------------------------------------------------------------------------------------------------------------------------------------------------------------------------------------------------------------------------------------------------------------------------------------------------------------------------------------------------------------------------------------------------------------------------------------------------------------------------------------------------------------------------------------------------------------------------------------------------------------------------------------------------------------------------------------------------------------------------------------------------------------------------------------------------------------------------------------------------------------------------------------------------------------------------------------------------------------------------------------------------------------------------------------------------------------------------------------------------------------------------------------------------------------------------------------------------------------------------------------------------------------------------------------------------------------------------------------------------------------------------------------------------------------------------------------------------------------------------------------------------------------------------------------------------------------------------------------------------|---------------------------------------------------------------------------------------------------------------------------------------------------------------------------------------------------------------------------------------------------------------------------------------------------------------------------------------------------------------------------------------------------------------------------------------------------------------------------------------------------------------------------------------------------------------------------------------------------------------------------------------------------------------------------------------------------------------------------------------------------------------------------------------------------------------------------------------------------------------------------------------------------------------------------------------------------------------------------------------------------------------------------------------------------------------------------------------------------------------------------------------------------------------------|
| <ol style="list-style-type: none"> <li>1. Must be <b>human subjects research</b></li> <li>2. Must be <b>about cancer</b></li> <li>3. Must include an intervention <b>delivered to dyads</b> <ol style="list-style-type: none"> <li>a. Dyad = 1 patient/survivor + 1 support person (e.g., spouse/partner, caregiver, other family member, friend)</li> <li>b. The support person is required to have a relationship with the patient prior to participation in the intervention (i.e., not assigned to the patient as part of the intervention).</li> <li>c. Both members of the dyad have to be enrolled/participate in the intervention, but there does not need to be outcomes assessed/reported for both members of the dyad.</li> <li>d. The intervention can be primarily focused on patients and include support people for only some of the intervention sessions, but it must include a support person for <i>all</i> of the enrolled patients (i.e., the intervention cannot include support people for only some of the enrolled patients, regardless of whether the support people that are enrolled participate in all sessions of the intervention).</li> <li>e. The intervention must be delivered to both members of the dyad <i>together</i> for at <i>least part</i> of the intervention (i.e., a patient and support person receiving separate intervention sessions with no sessions together would not count as dyadic).</li> <li>f. Group-based interventions may count as dyadic if the group consists of multiple dyads.</li> </ol> </li> <li>4. Must deal with <b>adult populations</b></li> <li>5. Must <b>contain an intervention with aspects of a positive psychology intervention</b> <ol style="list-style-type: none"> <li>a. Positive psychology intervention is the clinical or therapeutic arm of positive psychology. It integrates symptoms with strengths, risks with resources, weaknesses with values, and regrets with hopes, in order to understand the inherent complexities of human experience in a balanced way. It does not minimize or dismiss a client's concern but is considered a reorientation—"build what's strong" to supplement the traditional "fix what's wrong" approach; clients are taught to use their greatest resources—both personal and interpersonal—to meet life's challenges and actively facilitate growth, resilience, and well-being.</li> </ol> </li> <li>6. Article must be written in <b>English</b></li> <li>7. Article must be <b>peer-reviewed</b> (e.g., not an unpublished dissertation, book chapter, etc.)</li> <li>8. Must be <b>original research</b> (e.g., not meta analysis or review)</li> <li>9. Must <b>not be a case study</b></li> <li>10. Must <b>assess impact of intervention(s) on patient and/or spouse/caregiver/family member outcome(s)</b> (e.g., not a study protocol with no results reported, description of development/adaptation of intervention, or evaluation of impact of intervention on other types of processes or outcomes)</li> </ol> | <ol style="list-style-type: none"> <li>1. Is not human subjects research</li> <li>2. Is not about cancer</li> <li>3. Does not include an intervention delivered to dyads (e.g., only focused on patients/survivors, only focused on caregivers, etc.) <ol style="list-style-type: none"> <li>a. See notes under Inclusion Criterion #3 for details</li> </ol> </li> <li>4. Deals with children/pediatric populations</li> <li>5. Does not contain an intervention with aspects of a positive psychology intervention <ol style="list-style-type: none"> <li>a. See note under Inclusion Criterion #5 for details</li> </ol> </li> <li>6. Article not written in English</li> <li>7. Article not peer-reviewed (e.g., unpublished dissertation, book chapter, etc.)</li> <li>8. Not original research (e.g., meta-analysis or review)</li> <li>9. Case study</li> <li>10. Does not assess impact of intervention(s) on patient and/or spouse/caregiver outcome(s) (e.g., study protocol with no results reported, description of development/adaptation of intervention, or evaluation of impact of intervention on other types of processes or outcomes)</li> </ol> |

Supplemental Table S4. Sample Demographics from the Studies Included in this Review.

| Inter-<br>vention | Citation                                | Study type                                                       | N dyads<br>in final<br>sample | Race/<br>ethnicity                                                                                                                                                                                                   | Age (M, SD)                                                                                                                                          | % Female                                                                                                                     | Annual Household Income<br>(mode, unless otherwise<br>indicated)                                                                                                                                                                       | Education                                                                                                                                                                                                               |
|-------------------|-----------------------------------------|------------------------------------------------------------------|-------------------------------|----------------------------------------------------------------------------------------------------------------------------------------------------------------------------------------------------------------------|------------------------------------------------------------------------------------------------------------------------------------------------------|------------------------------------------------------------------------------------------------------------------------------|----------------------------------------------------------------------------------------------------------------------------------------------------------------------------------------------------------------------------------------|-------------------------------------------------------------------------------------------------------------------------------------------------------------------------------------------------------------------------|
| 4Cs<br>program    | Li et al.<br>(2015) <sup>62</sup>       | Single-arm<br>trial                                              | 92                            | Not reported (study conducted in<br>China with Mandarin speakers)                                                                                                                                                    | PT: 57.7, 11.4<br>SP: 56.8, 10.7                                                                                                                     | PT: 33.3%<br>SP: 66.7%                                                                                                       | 2001-6000 RMB/month (64.1% of<br>sample)                                                                                                                                                                                               | Mode: “primary school or less”<br>PT: 50.4%<br>SP: 53.0%                                                                                                                                                                |
| ACT               | Mosher et<br>al. (2019) <sup>63</sup>   | RCT: ACT<br>vs.<br>education/<br>support<br>control<br>condition | 50                            | PT <sub>ACT</sub> : 80.00% Non-Hispanic<br>White<br>PT <sub>control</sub> : 92.00% Non-Hispanic<br>White<br>CG <sub>ACT</sub> : 80.00% Non-Hispanic<br>White<br>CG <sub>control</sub> : 88.00% Non-Hispanic<br>White | PT <sub>ACT</sub> : 63.20, 11.27<br>PT <sub>control</sub> : 62.00, 13.13<br>CG <sub>ACT</sub> : 61.64, 11.52<br>CG <sub>control</sub> : 52.40, 18.10 | PT <sub>ACT</sub> : 44.00%<br>PT <sub>control</sub> : 44.00%<br>CG <sub>ACT</sub> : 76.00%<br>CG <sub>control</sub> : 84.00% | PT <sub>ACT</sub> : \$0-\$50,999 (40%)<br>PT <sub>control</sub> : \$51,000-\$99,999 (40%)<br>CG <sub>ACT</sub> : \$0-\$50,999 (40%)<br>CG <sub>control</sub> : \$0-\$50,999; \$51,000-<br>\$99,999; \$100,000 or more (32.00%<br>each) | Years (M, SD):<br>PT <sub>ACT</sub> : 14.28, 2.57<br>PT <sub>control</sub> : 13.56, 2.65<br>CG <sub>ACT</sub> : 14.44, 2.57<br>CG <sub>control</sub> : 14.88, 2.71                                                      |
| CBM               | Milbury et<br>al. (2020) <sup>37</sup>  | RCT: CBM<br>vs. UC                                               | 35                            | PT <sub>CBM</sub> : 78% Non-Hispanic White<br>PT <sub>control</sub> : 81% Non-Hispanic White<br>SP <sub>CBM</sub> : 72% Non-Hispanic White<br>SP <sub>control</sub> : 75% Non-Hispanic White                         | PT <sub>CBM</sub> : 57.67, 12.18<br>PT <sub>control</sub> : 55.82, 11.00<br>SP <sub>CBM</sub> : 56.67, 13.21<br>SP <sub>control</sub> : 52.12, 10.95 | PT <sub>CBM</sub> : 44%<br>PT <sub>control</sub> : 47%<br>SP <sub>CBM</sub> : 66%<br>SP <sub>control</sub> : 59%             | ≥\$75,000<br>PT <sub>CBM</sub> : 89%<br>PT <sub>control</sub> : 71<br>SP <sub>CBM</sub> : 89<br>SP <sub>control</sub> : 76                                                                                                             | Mode: “some college or more”:<br>PT <sub>CBM</sub> : 72%<br>PT <sub>control</sub> : 59%<br>SP <sub>CBM</sub> : 89%<br>SP <sub>control</sub> : 71%                                                                       |
| CDGI              | Saita et al.<br>(2016) <sup>64</sup>    | RCT: CDGI<br>vs. UC                                              | 50                            | Not reported (study conducted in<br>Northern Italy with Italian<br>speakers)                                                                                                                                         | CDGI: 62, 8.80<br>Control: 62, 8.12                                                                                                                  | CDGI: 87.5%<br>Control: 79.4%                                                                                                | Not reported                                                                                                                                                                                                                           | Mode: “did not graduate from<br>high school”<br>CDGI: 62.6%<br>Control: 58.8%                                                                                                                                           |
| CECT              | Collins et al.<br>(2013) <sup>65</sup>  | Single-arm<br>pilot<br>feasibility &<br>acceptability<br>trial   | 12                            | Not reported                                                                                                                                                                                                         | Median: 64 (SD=8)                                                                                                                                    | PT: 0%<br>SP: 100%                                                                                                           | Not reported                                                                                                                                                                                                                           | Mode:<br>PT: “tertiary education” (70%)<br>SP: Not reported                                                                                                                                                             |
|                   | Couper et<br>al. (2015) <sup>66</sup>   | RCT: CECT<br>vs. UC                                              | 62                            | Not reported                                                                                                                                                                                                         | PT <sub>UC</sub> : 65, 1.5<br>PT <sub>CECT</sub> : 64, 1.9<br>SP <sub>UC</sub> : 62, 1.5<br>SP <sub>CECT</sub> : 60, 1.9                             | PT: 0%<br>SP: 100%                                                                                                           | Not reported                                                                                                                                                                                                                           | Mode:<br>PT <sub>UC</sub> : “Undergraduate” (28.13%)<br>PT <sub>CECT</sub> : “High school certificate”<br>(33.33%)<br>SP <sub>UC</sub> : “Apprenticeship” (56.25%)<br>SP <sub>CECT</sub> : “Apprenticeship”<br>(59.38%) |
| COPE              | McMillan et<br>al. (2006) <sup>52</sup> | RCT: COPE +<br>usual<br>hospice care                             | 329                           | Not reported                                                                                                                                                                                                         | PT <sub>COPE+UC</sub> : 70.84, 10.99<br>PT <sub>UC</sub> : 70.12, 12.58<br>PT <sub>UC+3 visits</sub> : 71.02, 12.12                                  | PT <sub>COPE+UC</sub> : 36.9%<br>PT <sub>UC</sub> : 44.0%<br>PT <sub>UC+3 visits</sub> : 38.5%                               | Not reported                                                                                                                                                                                                                           | Years (M, SD):<br>PT <sub>COPE+UC</sub> : 11.84, 3.41<br>PT <sub>UC</sub> : 12.49, 2.80                                                                                                                                 |

|                                             |                                                                                  |                                                   |     |                                                                                                                                                                                                                                                                                          |                                                                                                                                                      |                                                                                                                  |                                                        |                                                                                                                                                             |
|---------------------------------------------|----------------------------------------------------------------------------------|---------------------------------------------------|-----|------------------------------------------------------------------------------------------------------------------------------------------------------------------------------------------------------------------------------------------------------------------------------------------|------------------------------------------------------------------------------------------------------------------------------------------------------|------------------------------------------------------------------------------------------------------------------|--------------------------------------------------------|-------------------------------------------------------------------------------------------------------------------------------------------------------------|
|                                             |                                                                                  | (UC) vs. UC<br>vs. UC + 3<br>supportive<br>visits |     |                                                                                                                                                                                                                                                                                          | CG <sub>COPE+UC</sub> : 63.06, 13.58<br>CG <sub>UC</sub> : 59.58, 15.27<br>CG <sub>UC+3 visits</sub> : 61.53, 15.47                                  | CG <sub>COPE+UC</sub> : 76.6%<br>CG <sub>UC</sub> : 80.7%<br>CG <sub>UC+3 visits</sub> : 99.1 %                  |                                                        | PT <sub>UC+3 visits</sub> : 12.28, 3.21<br>CG <sub>COPE+UC</sub> : 13.05, 2.98<br>CG <sub>UC</sub> : 12.86, 2.25<br>CG <sub>UC+3 visits</sub> : 12.70, 2.43 |
| McMillan &<br>Small<br>(2007) <sup>32</sup> | Secondary<br>analysis of<br>data from<br>McMillan et<br>al. (2006) <sup>52</sup> |                                                   | 329 | See McMillan et al. (2006) <sup>52</sup>                                                                                                                                                                                                                                                 | See McMillan et al. (2006) <sup>52</sup>                                                                                                             | See McMillan et al. (2006) <sup>52</sup>                                                                         | See McMillan et al. (2006) <sup>52</sup>               | See McMillan et al. (2006) <sup>52</sup>                                                                                                                    |
| Meyers et<br>al. (2011) <sup>51</sup>       | RCT: COPE<br>vs. UC                                                              |                                                   | 476 | PT: 88% Caucasian/Other, 9%<br>Hispanic (any race), 7%<br>Asian/Pacific Islander, 5%<br>African American, 1% Native<br>American/Indigenous<br>CG: 85% Caucasian/Other, 8%<br>Hispanic (any race), 8%<br>Asian/Pacific Islander, 6%<br>African American, 1% Native<br>American/Indigenous | PT: 61.5 (SD not reported)<br>CG: 61.4 (SD not reported)                                                                                             | PT: 55%<br>CG: 31%                                                                                               | PT: >\$80,000 (29%)<br>CG: Not reported                | Mode: "College"<br>PT: 39%<br>CG: 47%                                                                                                                       |
| CSC                                         | Gremore et<br>al. (2021) <sup>67</sup>                                           | Pilot RCT:<br>CSC vs. UC                          | 20  | PT: 85% Caucasian, 15%<br>Asian/Pacific Islander<br>SP: 80% Caucasian, 20%<br>Asian/Pacific Islander                                                                                                                                                                                     | PT: 54, 15.5<br>SP: 53, 9.4                                                                                                                          | PT: 5%<br>SP: 95%                                                                                                | Not reported                                           | M years, SD:<br>PT: 15, 4.1<br>SP: 15, 4.1                                                                                                                  |
| Dignity<br>Therapy                          | Wang et al.<br>(2021) <sup>68</sup>                                              | RCT                                               | 68  | Not reported (study conducted in<br>China with Chinese speakers)                                                                                                                                                                                                                         | PT: 49.42, 12.33<br>CG: 38.30, 8.86                                                                                                                  | PT: 47.2%<br>CG: 45.3%                                                                                           | PT: 1000-3000 RMB/month<br>(39.6%)<br>CG: Not reported | Mode: "Middle or high school"<br>PT: 58.5%<br>CG: 56.6%                                                                                                     |
|                                             | Milbury, et<br>al. (2018) <sup>69</sup>                                          | Single-arm<br>pilot study                         | 5   | PT: 60% Latino/Hispanic, 20%<br>Non-Hispanic/White, 20%<br>missing<br>CG: 80% Latino/Hispanic, 20%<br>Non-Hispanic/White                                                                                                                                                                 | PT: 51.94, 20.20<br>CG: 58.16, 10.15                                                                                                                 | PT: 80%<br>CG: 60%                                                                                               | ≥\$50,000<br>PT: 60%<br>CG: 80%                        | Mode: "Some college or higher"<br>PT: 80%<br>CG: 100%                                                                                                       |
| DYP                                         | Millbury,<br>Li, et al.<br>(2019) <sup>70</sup>                                  | Pilot RCT                                         | 20  | PT <sub>DYP</sub> : 90% Non-Hispanic/White,<br>10% Latino/Hispanic<br>PT <sub>control</sub> : 80% Non-<br>Hispanic/White, 20%<br>Latino/Hispanic<br>CG <sub>DYP</sub> : 80% Non-Hispanic/White,<br>10% Latino/Hispanic, 10%<br>African American                                          | PT <sub>DYP</sub> : 47.91, 14.66<br>PT <sub>control</sub> : 44.73, 12.23<br>CG <sub>DYP</sub> : 52.36, 16.00<br>CG <sub>control</sub> : 48.27, 11.88 | PT <sub>DYP</sub> : 50%<br>PT <sub>control</sub> : 50%<br>CG <sub>DYP</sub> : 70%<br>CG <sub>control</sub> : 60% | ≥\$50,000 (100% of sample)                             | Mode: "Some college or higher"<br>PT <sub>DYP</sub> : 100%<br>PT <sub>control</sub> : 90%<br>CG <sub>DYP</sub> : 80%<br>CG <sub>control</sub> : 80%         |

| CG <sub>control</sub> : 70% Non-Hispanic/White, 20% Latino/Hispanic, 10% >1 race                             |                                       |                                                                       |                                                 |                                                                                                                                 |                                                          |                                               |                                |                                                                        |
|--------------------------------------------------------------------------------------------------------------|---------------------------------------|-----------------------------------------------------------------------|-------------------------------------------------|---------------------------------------------------------------------------------------------------------------------------------|----------------------------------------------------------|-----------------------------------------------|--------------------------------|------------------------------------------------------------------------|
| Millbury, Liao, et al. (2019) <sup>71</sup>                                                                  | Pilot RCT                             | 26                                                                    | PT <sub>DYP</sub> : 85% Non-Hispanic White      | PT <sub>DYP</sub> : 66.15, 5.48                                                                                                 | PT <sub>DYP</sub> : 38%                                  | ≥\$50,000                                     | Mode: “Some college or higher” |                                                                        |
|                                                                                                              |                                       |                                                                       | PT <sub>control</sub> : 100% Non-Hispanic White | PT <sub>control</sub> : 65.54, 12.53                                                                                            | PT <sub>control</sub> : 38%                              | PT <sub>DYP</sub> : 92%                       | PT <sub>DYP</sub> : 77%        |                                                                        |
|                                                                                                              |                                       |                                                                       | CG <sub>DYP</sub> : 85% Non-Hispanic White      | CG <sub>DYP</sub> : 62.01, 11.37                                                                                                | CG <sub>DYP</sub> : 62%                                  | PT <sub>control</sub> : 85%                   | PT <sub>control</sub> : 77%    |                                                                        |
|                                                                                                              |                                       |                                                                       | CG <sub>control</sub> : 100% Non-Hispanic White | CG <sub>control</sub> : 56.9, 15.17                                                                                             | CG <sub>control</sub> : 83%                              | CG <sub>DYP</sub> : 85%                       | CG <sub>DYP</sub> : 85%        |                                                                        |
|                                                                                                              |                                       |                                                                       |                                                 |                                                                                                                                 |                                                          | CG <sub>control</sub> : 69%                   | CG <sub>control</sub> : 69%    |                                                                        |
| ECG                                                                                                          | Manne et al. (2016) <sup>53</sup>     | RCT: ECG vs. couples' support group (SG)                              | 302                                             | PT <sub>ECG</sub> : 86.1% Non-Hispanic White, 9.3% Black, 2.6% Hispanic, 0.7% Asian, 0.7% Hawaiian/Pacific Islander, 0.7% Other |                                                          |                                               |                                |                                                                        |
|                                                                                                              |                                       |                                                                       |                                                 | PT <sub>SG</sub> : 85.4% Non-Hispanic White, 7.9% Black, 2.6% Hispanic, 1.3% Asian, 1.3% Other, 1.3% missing                    | PT <sub>ECG</sub> : 55.8, 10.9                           | PT <sub>ECG</sub> : 100%                      | Medians:                       | Mode: “> college”                                                      |
|                                                                                                              |                                       |                                                                       |                                                 | CG <sub>ECG</sub> : 80.1% Non-Hispanic White, 8.6% Black, 7.3% Hispanic, 2.0% Other, 1.3% missing, 0.7% Asian                   | PT <sub>SG</sub> : 54.4, 9.9                             | PT <sub>SG</sub> : 100%                       | PT <sub>ECG</sub> : \$95,000   | PT <sub>ECG</sub> : 55.6%                                              |
|                                                                                                              |                                       |                                                                       |                                                 | SP <sub>ECG</sub> : 57.1, 11.6                                                                                                  | SP <sub>ECG</sub> : 1.4%                                 | PT <sub>SG</sub> : \$100,000                  | PT <sub>SG</sub> : 58.9%       |                                                                        |
|                                                                                                              |                                       |                                                                       |                                                 |                                                                                                                                 | SP <sub>SG</sub> : 55.5, 11.1                            | SP <sub>SG</sub> : 0%                         | SP <sub>ECG</sub> : \$95,000   | SP <sub>ECG</sub> : 54.3%                                              |
|                                                                                                              |                                       |                                                                       |                                                 |                                                                                                                                 |                                                          |                                               | SP <sub>SG</sub> : \$100,000   | SP <sub>SG</sub> : 60.0%                                               |
| CG <sub>SG</sub> : 84.1% Non-Hispanic White, 8.6% Black, 2.6% Hispanic, 1.3% Asian, 1.3% Other, 1.3% missing |                                       |                                                                       |                                                 |                                                                                                                                 |                                                          |                                               |                                |                                                                        |
| FOCUS                                                                                                        | Northouse et al. (2002) <sup>72</sup> | RCT: FOCUS + UC vs. UC                                                | 117                                             | Not reported                                                                                                                    | Not reported                                             | PT: 100%<br>Family: Not reported              | Not reported                   | Not reported                                                           |
|                                                                                                              | Northouse et al. (2005) <sup>73</sup> | RCT: FOCUS + UC vs. UC                                                | 134                                             | 77% Caucasian, 19% African American, 4% Hispanic, Asian, or Native American                                                     | PT: 54, 11.0<br>CG: 52, 14.0                             | PT: 100%<br>CG: Not reported (between 13-35%) | Median: \$30,000-\$50,000      | Years (M, SD):<br>14 (SD not reported)                                 |
|                                                                                                              | Northouse et al. (2007) <sup>55</sup> | RCT: FOCUS vs. UC                                                     | 235                                             | 84% Caucasian, 14% African American, 2% Hispanic, Asian, Native American, or mixed race                                         | PT: 63, 9.1<br>SP: 59, 9.7                               | PT: 0%<br>CG: Not reported                    | Median: \$50,000-\$75,000      | Years (M, SD):<br>PT: 16 (SD not reported)<br>SP: 15 (SD not reported) |
|                                                                                                              | Harden et al. (2009) <sup>29</sup>    | Secondary analysis of data from Northouse et al. (2007) <sup>55</sup> | 86                                              | 85% Caucasian                                                                                                                   | PT: 63.7 (SD not reported)<br>SP: 59.6 (SD not reported) | Not reported                                  | ≥\$75,000 (54% of sample)      | Mode: “had college degrees” (71% of sample)                            |



|       |                                       |                                                                       |              |                                                                                                                                                                                                        |                                        |                                        |                                                                                     |                                                                             |
|-------|---------------------------------------|-----------------------------------------------------------------------|--------------|--------------------------------------------------------------------------------------------------------------------------------------------------------------------------------------------------------|----------------------------------------|----------------------------------------|-------------------------------------------------------------------------------------|-----------------------------------------------------------------------------|
|       | Northouse et al. (2013) <sup>74</sup> | RCT: brief FOCUS vs. extensive FOCUS vs. UC                           | 302          | 82.5% Caucasian, 13.5% African American, 1.3% American Indian, 1.3% Asian, 1% Hispanic, 0.3% multi-racial                                                                                              | PT: 60.5, 10.9<br>CG: 56.7, 12.6       | PT: 61.4%<br>CG: 55.8%                 | Not reported                                                                        | Years (M, SD):<br>14.8, 2.7                                                 |
|       | Northouse et al. (2014) <sup>54</sup> | Single-arm feasibility study                                          | 38           | PT: 92.1% White, 5.3% African American, 2.6% Asian<br>CG: 92.1% White, 5.3% African American, 2.6% Asian                                                                                               | PT: 54.8, 12.6<br>CG: 50.6, 14.7       | PT: 57.9%<br>CG: 60.5%                 | \$50,001-\$100,000<br>PT: 44.7%<br>CG: 36.8%                                        | Mode: "postcollege"<br>PT: 34.2%<br>CG: 42.1%                               |
|       | Martinez et al. (2015) <sup>31</sup>  | Secondary analysis of data from Northouse et al. (2013) <sup>74</sup> | 484 patients | 78.9% White, 14.5% Black, 6.6% Other                                                                                                                                                                   | 60.5 (SD not reported)                 | 62%                                    | \$30,000-\$74,999 (34% of sample)                                                   | Mode: "some college or more" (65% of sample)                                |
|       | Dockham et al. (2016) <sup>75</sup>   | Single-arm pilot effectiveness study                                  | 34           | PT: 89.2% White, 5.4% African American, 2.7% Asian, 2.7% Native American<br>CG: 86.5% White, 5.4% African American, 2.7% Asian, 2.7% Native American, 2.7% missing                                     | PT: 53.8, 11.0<br>CG: 53.4, 11.1       | PT: 73.0%<br>CG: 35.1%                 | PT: \$75,001-\$100,000 and >\$100,000 (18.9% each)<br>CG: \$50,001-\$75,000 (27.0%) | Mode:<br>PT: "Graduate [school]" (40.5%)<br>CG: "Bachelor's degree" (43.2%) |
|       | Titler et al. (2017) <sup>56</sup>    | Single-arm trial                                                      | 36           | PT: 88.9% White, 2.8% Asian, 2.8% Black/African American, 2.8% Latino/Hispanic, 2.8% Other<br>CG: 77.8% White, 8.3% Asian, 2.8% Black/African American, 2.8% Latino/Hispanic, 2.8% Other, 5.5% missing | PT: 60.8, 14.2<br>CG: 55.9, 15.1       | PT: 52.8%<br>CG: 55.6%                 | ≥\$100,000<br>PT: 44.4%<br>CG: 41.7%                                                | Mode:<br>PT: "Graduate degree" (47.2%)<br>CG: College graduate (38.9%)      |
|       | Chen et al. (2021) <sup>76</sup>      | Single-arm pilot study                                                | 29           | 90.0% White, 3.3% Asian, 3.3% Black, 3.3% Latino/Hispanic                                                                                                                                              | PT: 68, 11<br>CG: 61.7, 13.5           | PT: 70.0%<br>CG: 56.7%                 | Not reported                                                                        | Mode:<br>PT: "High school" (33.3%)<br>CG: "College or some college" (50.0%) |
|       | Titler et al. (2020) <sup>77</sup>    | Secondary analysis of data from Titler et al. (2017) <sup>56</sup>    | 36           | See Titler et al. (2017) <sup>56</sup>                                                                                                                                                                 | See Titler et al. (2017) <sup>56</sup> | See Titler et al. (2017) <sup>56</sup> | See Titler et al. (2017) <sup>56</sup>                                              | See Titler et al. (2017) <sup>56</sup>                                      |
| I-BMS | Lau et al. (2020) <sup>35</sup>       | RCT: I-BMS vs. CBT (same data as Xiu et al. (2020); <sup>36</sup>     | 157          | Not reported (study conducted in Hong Kong with Chinese patients & their caregivers)                                                                                                                   | PT: 60.0, 9.5<br>CG: 53.9, 12.2        | PT: 59.9%<br>CG: 52.2%                 | Not reported                                                                        | Mode: "secondary"<br>PT: 47.1%<br>CG: 46.5%                                 |

|            |                                        |                                                                        |     |                                                                                                                                                                                 |                                       |                                       |                                         |                                                                      |
|------------|----------------------------------------|------------------------------------------------------------------------|-----|---------------------------------------------------------------------------------------------------------------------------------------------------------------------------------|---------------------------------------|---------------------------------------|-----------------------------------------|----------------------------------------------------------------------|
|            |                                        | report on PT outcomes)                                                 |     |                                                                                                                                                                                 |                                       |                                       |                                         |                                                                      |
|            |                                        | RCT: I-BMS vs. CBT                                                     |     |                                                                                                                                                                                 |                                       |                                       |                                         |                                                                      |
|            | Xiu et al. (2020) <sup>36</sup>        | (same data as Lau et al. (2020)); <sup>35</sup> report on CG outcomes) | 157 | See Lau et al. (2020) <sup>35</sup>                                                                                                                                             | See Lau et al. (2020) <sup>35</sup>   | See Lau et al. (2020) <sup>35</sup>   | See Lau et al. (2020) <sup>35</sup>     | See Lau et al. (2020) <sup>35</sup>                                  |
| MBSR       | Birnie et al. (2010) <sup>78</sup>     | Single-arm trial                                                       | 21  | Not reported (study conducted in Canada)                                                                                                                                        | PT: 62.9, 7.4<br>SP: 62.8, 9.3        | PT: 52.4%<br>SP: 47.6%                | Not reported                            | Years (M, SD):<br>PT: 14.9, 3.6<br>SP: 14.3, 4.2                     |
| MBSR-C     | Lengacher et al. (2012) <sup>80</sup>  | Single-arm pilot study                                                 | 26  | PT: 73.1% White Non-Hispanic, 15.4% White Hispanic, 11.5% Black Non-Hispanic<br>CG: 88.5% White Non-Hispanic, 3.8% White Hispanic, 3.8% Black Non-Hispanic, 3.8% Black Hispanic | PT: 53.5, 10.4<br>CG: 51.5, 14.6      | PT: 69.2%<br>CG: 61.5%                | Not reported                            | Mode: “some college”<br>PT: 38.5%<br>CG: 38.5%                       |
|            | Cottingham et al. (2019) <sup>81</sup> | Secondary analysis of Johns et al. (2020) <sup>79</sup>                | 12  | See Johns et al. (2020) <sup>79</sup>                                                                                                                                           | See Johns et al. (2020) <sup>79</sup> | See Johns et al. (2020) <sup>79</sup> | See Johns et al. (2020) <sup>79</sup>   | See Johns et al. (2020) <sup>79</sup>                                |
| MODEL Care | Johns et al. (2020) <sup>79</sup>      | Single-arm pilot study                                                 | 13  | PT: 92.31% White/Caucasian, 7.69% Black/African American<br>CG: 69.23% White/Caucasian, 15.4% Black/African American, 7.69% American Indian/Alaska Native, 7.69% Asian          | PT: 62.9, 10.6<br>CG: 56.6, 15.6      | PT: 46.2%<br>CG: 76.9%                | “Comfortable”<br>PT: 69.2%<br>CG: 61.5% | Mode: At least “Some college” PT: 76.9%<br>CG: 84.6%                 |
| PIP/MPI    | Chien et al. (2020) <sup>82</sup>      | RCT: PIP vs. MPI vs. control                                           | 103 | 100% Asian                                                                                                                                                                      | PT: 67.8, 6.2<br>SP: 63.6, 7.3        | PT: 0%<br>SP: Not reported            | Not reported                            | Mode:<br>PT: “college or above” (45.6%)<br>SP: “high school” (41.7%) |
| PERC       | Song et al. (2015) <sup>61</sup>       | Single-arm pilot feasibility & acceptability study                     | 22  | PT: 72.7% White, 27.3% Black<br>SP: Not reported                                                                                                                                | PT: 62.9, 8.2<br>SP: 59.3, 10.7       | PT: 0%<br>SP: Not reported            | >\$50,000 (68.2% of sample)             | Mode: College degree or higher<br>PT: 68.2%<br>SP: 72.7%             |
| PICP       | Kayser et al. (2010) <sup>83</sup>     | RCT: PICP vs. hospital standard                                        | 47  | 90% White                                                                                                                                                                       | PT: 46.3, 9.8<br>SP: 48.7, 10.7       | Not reported                          | >\$90,000 (69.6% of sample)             | Mode: College graduate<br>PT: 87.3%<br>SP: 89.4%                     |

|                      |                                       |                                                                                                 |     |                                                                                                            |                                    |                                                                                                                                                                                                 |                                                            |                                                          |
|----------------------|---------------------------------------|-------------------------------------------------------------------------------------------------|-----|------------------------------------------------------------------------------------------------------------|------------------------------------|-------------------------------------------------------------------------------------------------------------------------------------------------------------------------------------------------|------------------------------------------------------------|----------------------------------------------------------|
| social work services |                                       |                                                                                                 |     |                                                                                                            |                                    |                                                                                                                                                                                                 |                                                            |                                                          |
| PSE                  | Bevans et al. (2010) <sup>84</sup>    | Single-arm pilot feasibility study                                                              | 8   | PT: 87.5% White Non-Hispanic, 12.5% White Hispanic<br>SP: 87.5% White Non-Hispanic, 12.5% White Hispanic   | PT: 56.5, 7.9<br>SP: 53.9, 9.7     | PT: 25.0%<br>SP: 62.5%<br><i>[Note: The text states, "All dyads were husband and wife pairs," but Table 1 (demographics) reports that 75.0% of patients and 37.5% of caregivers were male.]</i> | Not reported                                               | Mode: "At least some college"<br>PT: 75%<br>SP: 75%      |
| RE                   | Baucom et al. (2009) <sup>85</sup>    | Pilot RCT: RE vs. UC                                                                            | 14  | 86% White                                                                                                  | Median: 50                         | PT: 100%<br>SP: 0%                                                                                                                                                                              | Not reported                                               | Median: 16 years                                         |
| RIPSToP              | Robertson et al. (2016) <sup>86</sup> | RCT: RIPSToP vs. UC                                                                             | 43  | 100% White                                                                                                 | PT: 63.7<br>SP: Not reported       | PT: 0.0%<br>SP: 95.5%                                                                                                                                                                           | Not reported                                               | Not reported                                             |
| Side by Side         | Heinrichs et al. (2012) <sup>87</sup> | RCT: Side by Side vs. control                                                                   | 72  | Not reported                                                                                               | PT: 52.2, 11.3<br>SP: 52.7, 11.4   | PT: 100%<br>SP: 0%                                                                                                                                                                              | Not reported                                               | Mode: "more than 10 years"<br>PT: 44%<br>SP: 54%         |
| TSM                  | Mosher et al. (2016) <sup>50</sup>    | RCT: TSM vs. education control condition                                                        | 106 | PT: 90.6% Non-Hispanic White<br>CG: 89.6% Non-Hispanic White, 0.9% missing                                 | PT: 62.7, 7.9<br>CG: 56.5, 13.9    | PT: 52.9%<br>CG: 89.5%                                                                                                                                                                          | \$21,000-\$50,999<br>PT: 30.8%<br>CG: 34.5%                | Years (M, SD):<br>PT: 13.1, 2.1<br>CG: 13.6, 2.6         |
|                      | Winger et al. (2018) <sup>34</sup>    | Secondary analysis of data from Mosher et al. (2016) <sup>50</sup>                              | 51  | PT: 88.2% Non-Hispanic White<br>CG: 86.3% Non-Hispanic White, 1.9% missing                                 | PT: 63.5, 7.7<br>CG: 56.3, 14.1    | PT: 54.9%<br>CG: 72.5%                                                                                                                                                                          | \$51,000-\$99,000<br>PT: 25.5%<br>CG: 33.3%                | Years (M, SD):<br>PT: 12.9, 2.2<br>CG: 13.9, 2.8         |
| TYC                  | Milbury et al. (2015) <sup>88</sup>   | Single-arm pilot study                                                                          | 10  | PT: 80.0% White, 10.0% Latino/Hispanic, 10.0% Other<br>CG: 80.0% White, 10.0% Latino/Hispanic, 10.0% Other | PT: 71.22, 6.16<br>CG: 68.77, 5.99 | PT: 35.7%<br>CG: 64.3%                                                                                                                                                                          | ≥\$50,000<br>PT: 70.0%<br>CG: 80.0%                        | Mode: "Some college or higher"<br>PT: 50.0%<br>CG: 57.1% |
| Unnamed              | Shields et al. (2004) <sup>89</sup>   | Non-randomized, controlled trial: 2-session intervention vs. 1-session intervention vs. control | 48  | Not reported                                                                                               | PT: 55.7, 11.7<br>SP: 60.6, 9.7    | PT: 100%<br>SP: 0%                                                                                                                                                                              | M, SD:<br>PT: \$70,553, \$28,871<br>SP: \$72,840, \$28,962 | Years (M, SD):<br>PT: 15.7, 2.5<br>SP: 15.6, 2.5         |
| Unnamed              | Wagner et al. (2016) <sup>90</sup>    | Single-arm pilot study                                                                          | 12  | Not reported                                                                                               | PT: 59.1<br>SP: 59.6               | PT: 63.6%<br>SP: 54.5%                                                                                                                                                                          | \$70,000<br>PT: Not reported                               | Mode: High School<br>PT: 45.4%                           |

|         |                                      |                                                                   |     |                                                          |                                       |                                       |                                         | SP: 54.5% | SP: 54.5%                                        |
|---------|--------------------------------------|-------------------------------------------------------------------|-----|----------------------------------------------------------|---------------------------------------|---------------------------------------|-----------------------------------------|-----------|--------------------------------------------------|
| Unnamed | Mosher et al. (2018) <sup>60</sup>   | RCT: peer helping + coping skills vs. coping skills               | 50  | PT: 86% Non-Hispanic White<br>CG: 88% Non-Hispanic White | PT: 58.2, 11.5<br>CG: 53.8, 13.6      | PT: 38%<br>CG: 66%                    | \$51,000-\$99,999<br>PT: 38%<br>CG: 40% |           | Years (M, SD):<br>PT: 14.6, 2.6<br>CG: 14.6, 2.1 |
| Unnamed | Clark et al. (2013) <sup>91</sup>    | RCT: intervention vs. UC                                          | 117 | PT: 97% White<br>CG: Not reported                        | PT: 59.3, 10.7<br>CG: Not reported    | PT: 34.5%<br>CG: Not reported         | Not reported                            |           | Not reported                                     |
|         | Piderman et al. (2014) <sup>33</sup> | Secondary analysis of data from Clark et al. (2013) <sup>91</sup> | 117 | See Clark et al. (2013) <sup>91</sup>                    | See Clark et al. (2013) <sup>91</sup> | See Clark et al. (2013) <sup>91</sup> | See Clark et al. (2013) <sup>91</sup>   |           | See Clark et al. (2013) <sup>91</sup>            |
|         | Lapid et al. (2016) <sup>30</sup>    | Secondary analysis of data from Clark et al. (2013) <sup>91</sup> | 116 | See Clark et al. (2013) <sup>91</sup>                    | See Clark et al. (2013) <sup>91</sup> | See Clark et al. (2013) <sup>91</sup> | See Clark et al. (2013) <sup>91</sup>   |           | See Clark et al. (2013) <sup>91</sup>            |

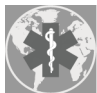

Supplement: s1 [file s1]
